# Supplementary material for: Variable contribution of wastewater treatment plant effluents to downstream nitrous oxide concentrations and emissions
Source: Copernicus journal article supplement (doi:10.5194/bg-21-3239-2024), 2024-07-17
Supplement: Supplementary file 1 [file bg-21-3239-2024-supplement.pdf]

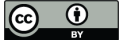

*Supplement of*

## **Variable contribution of wastewater treatment plant effluents to downstream nitrous oxide concentrations and emissions**

**Weiye Tang et al.**

*Correspondence to:* Weiye Tang ([weiyit@princeton.edu](mailto:weiyit@princeton.edu))

The copyright of individual parts of the supplement might differ from the article licence.

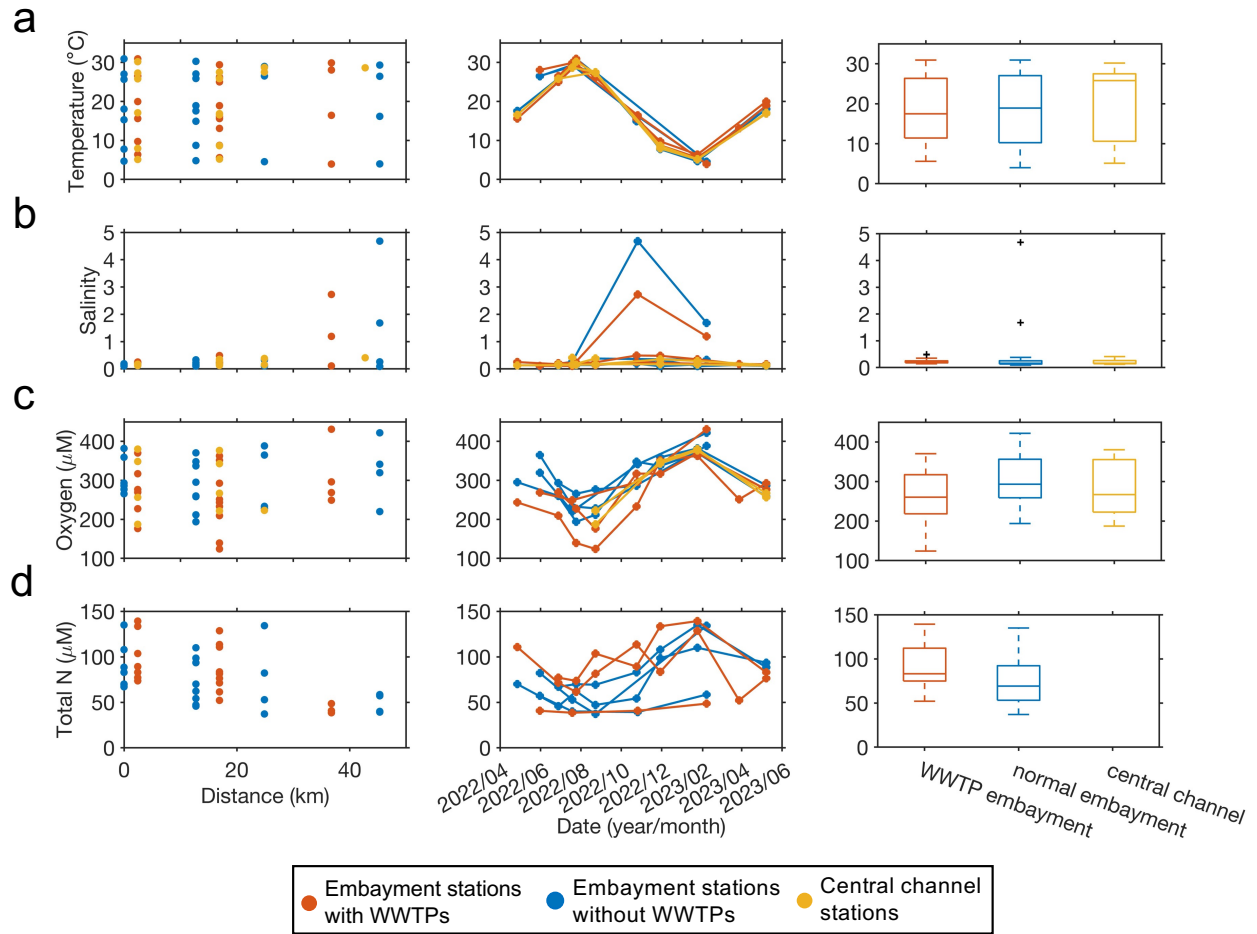

Fig. S1. Spatial and temporal variations of temperature (a), salinity (b), oxygen (c) and total nitrogen concentration (d). The distance shows from upstream to downstream stations in the Potomac River. Embayment stations associated with wastewater treatment plants (WWTPs, red circles and lines) and without WWTPs (blue circles and lines), and central channel stations (yellow circles and lines). Total N concentration was not measured at central channel stations. For the boxplots, the red line in each box is the median. The bottom and top of each box are the 25th and 75th percentiles of the observations, respectively. The error bars represent 1.5 times the interquartile range away from the bottom or top of the box, with red + signs showing outliers beyond that range.

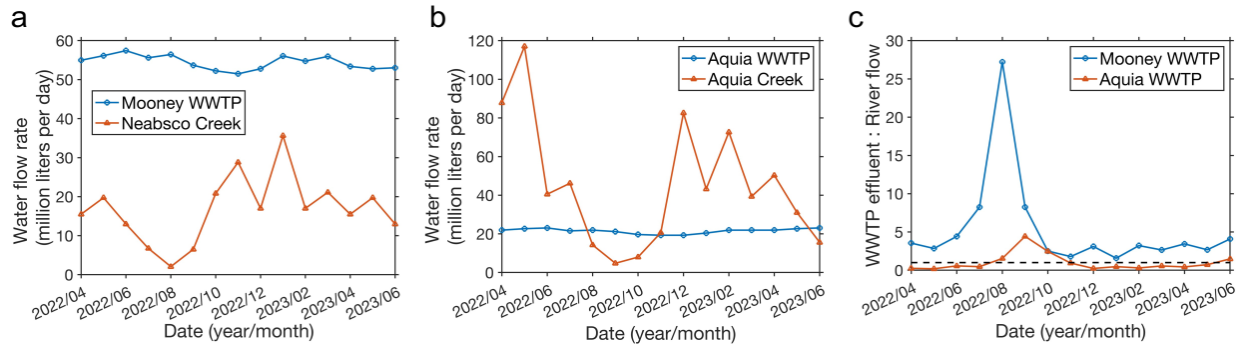

Fig. S2. Comparison between wastewater treatment plants effluents and riverine discharge. (a) Mooney WWTP vs Neabsco Creek. (b) Aquia WWTP vs Aquia Creek. (c) the ratio of wastewater treatment plants effluents to riverine discharge. The horizontal dashed line denotes a ratio of 1. Riverine discharges at monitoring stations upstream of the Mooney WWTP (monitoring station of Neabsco Creek at Dale City, Virginia) and Aquia WWTP (monitoring station of Aquia Creek near Garrisonville, Virginia) were obtained from United States Geological Survey (USGS). Climatological riverine discharge was used for Neabsco Creek because data were not available for years 2022 and 2023.

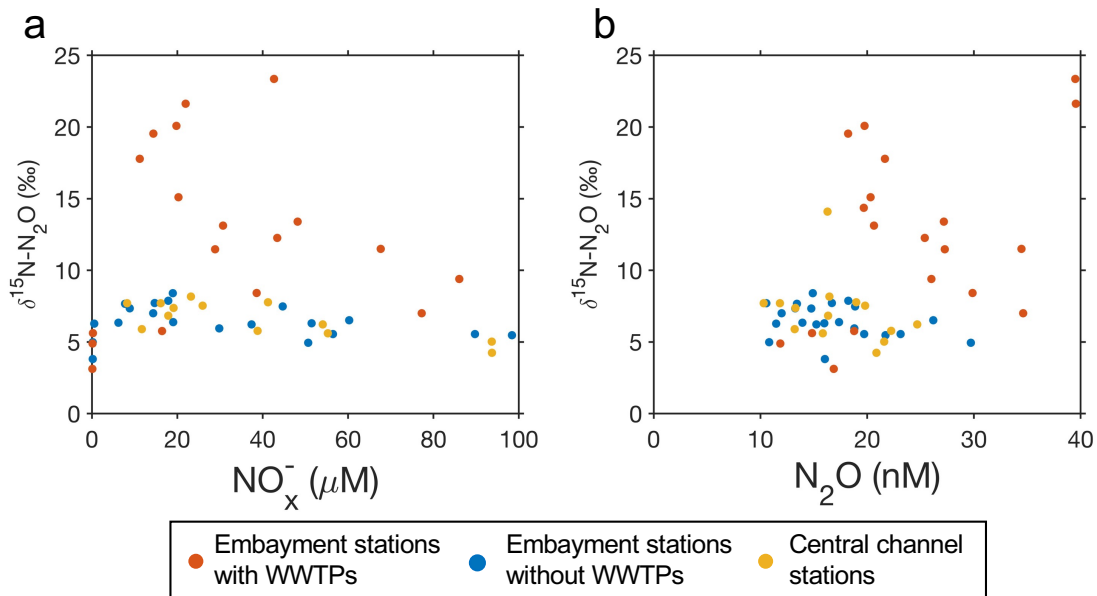

Fig. S3. The change in  $\delta^{15}\text{N}$  of  $\text{N}_2\text{O}$  in relation to the changes in  $\text{NO}_x^-$  concentrations (a) and  $\text{N}_2\text{O}$  concentrations (b).

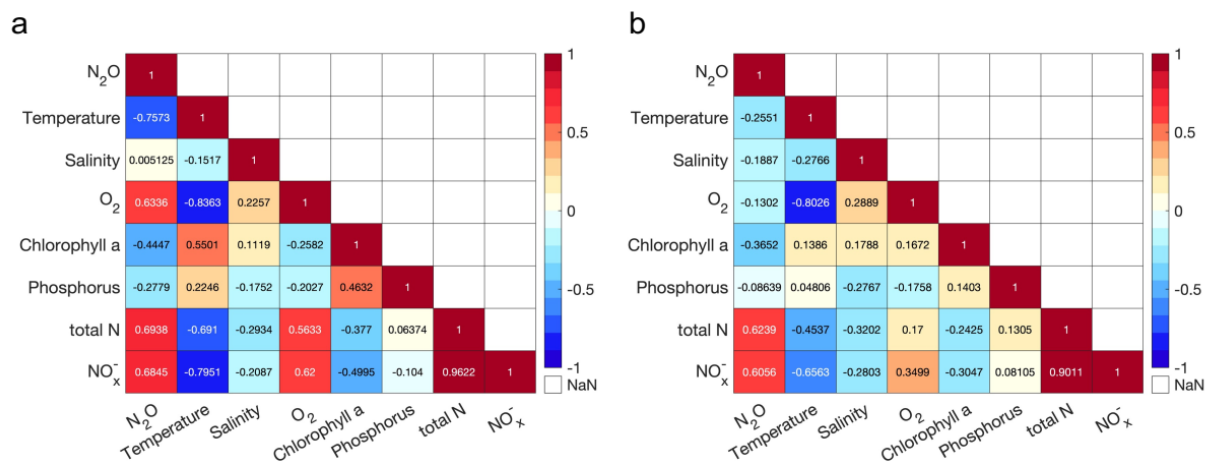

Fig. S4. Correlation coefficients among different environmental factors and N<sub>2</sub>O concentration for stations without (a) or with (b) the influence of WWTPs.

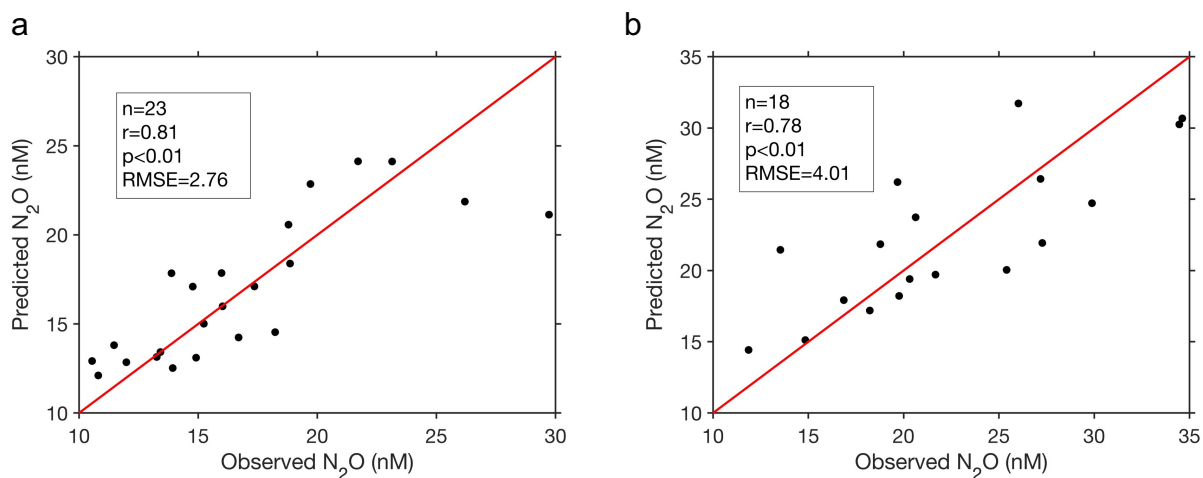

Fig. S5. Predicted versus observed N<sub>2</sub>O concentration based on a multiple linear regression model for stations without (a) or with (b) the influence of WWTPs. The number of data points (n), correlation coefficient (r), p value and root mean square error (RMSE) are presented in the legend.

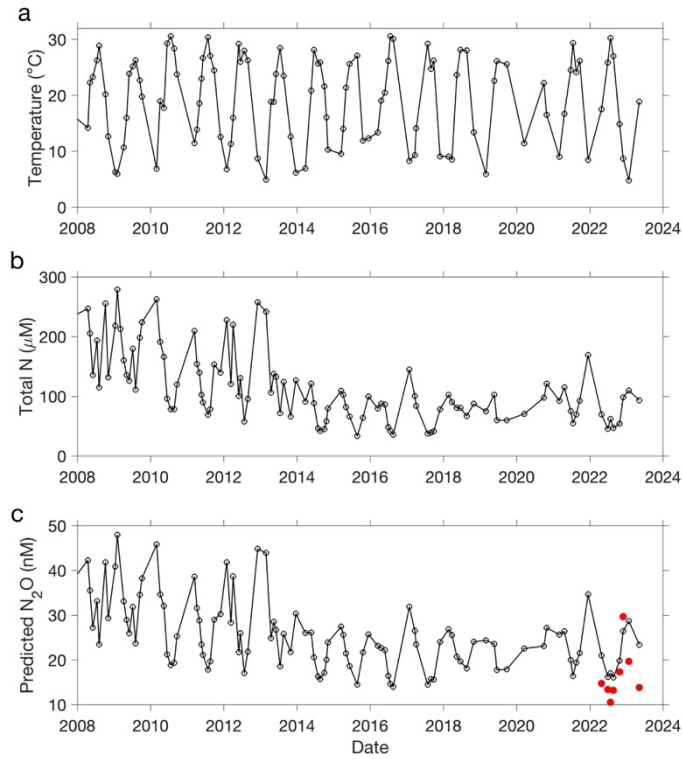

Fig. S6. Historical measurements of temperature (a) and N concentration (b) at the Pohick Bay sampling station with the influence of Noman Cole WWTP. N<sub>2</sub>O concentration (c) is predicted based on a multiple linear regression model developed for stations with the influence from WWTPs. The red points are the observed N<sub>2</sub>O concentration.

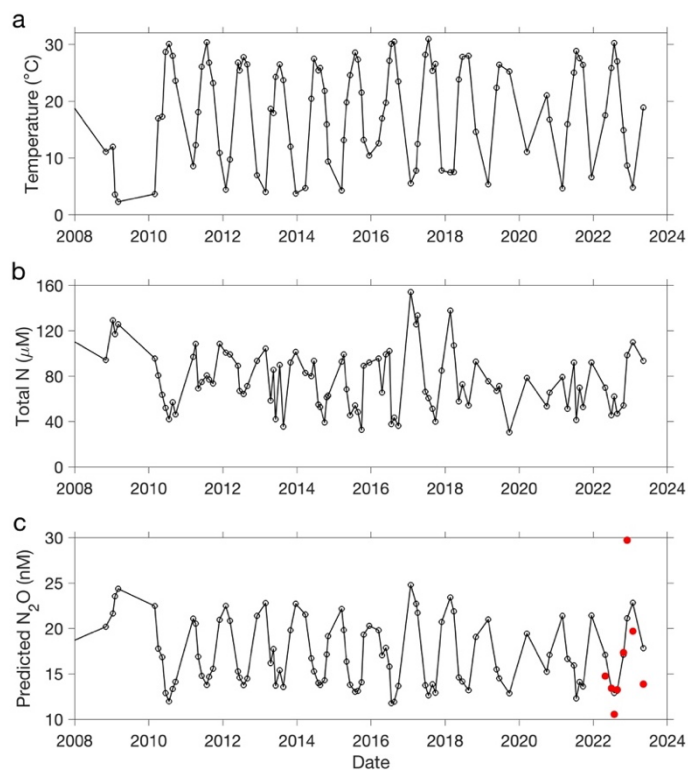

Fig. S7. Historical measurements of temperature (a) and N concentration (b) at the Occoquan Bay sampling station without the influence of WWTPs.  $\text{N}_2\text{O}$  concentration (c) is predicted based on a multiple linear regression model developed for stations without the influence from WWTPs. The red points are the observed  $\text{N}_2\text{O}$  concentration.

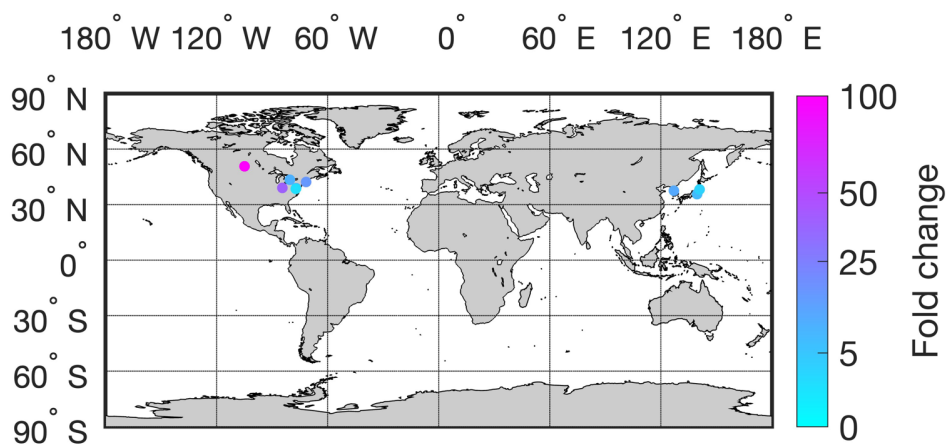

Fig. S8.  $\text{N}_2\text{O}$  observations associated with WWTPs globally, color-coded by the fold change in  $\text{N}_2\text{O}$  concentration, saturation or flux comparing downstream and upstream of WWTPs (see Table 1 for details).
